# Supplementary material for: Perinatal Outcome and Long-Term Infectious Morbidity of Offspring Born to Women with Known Tuberculosis
Source: J Clin Med. 2020 Aug 26;9(9):2768. doi: 10.3390/jcm9092768 (PMC7565561; doi:10.3390/jcm9092768)
Supplement: Supplementary file 1 [file jcm-09-02768-s001.xlsx]

## Sheet: tbl_dig_icd_new
dignum	ICDCode	DiagnosisName	Frequency
2	V23	בגלל HRP	118026
3	65941	ולדנות גבוהה	49879
5	65421	מצב לאחר ניתוח קיסרי	27655
6	V235	עבר מילדותי כושל	9606
8	V232	הפלות חוזרות	12177
9	V230	מצב לאחר טיפול בעקרות	4843
11	64241	MILD/MODERATE P.I.H	7811
12	64251	SEVERE P.I.H	2680
13	64201	לחץ דם כרוני	3769
14	64881	סכרת הריונית CLASS A	11263
15	64801	CLASS B-R	2697
16	65701	POLYHYDRAMNION	8595
17	65801	OLIGOHRAMNION	5479
18	V280	דיקור מי שפיר	21820
19	65811	ירידת מים מוקדמת	17620
20	65451	אי ספיקת צוארית	1092
21	65611	RH-ISOIMMUNISATION	72
22	64191	דמם במחצית שניה של ההיריון	123
23	64410	התכווצות מוקדמת	854
24	v237	LOPC	21770
27	65661	EXCESSIVE FETAL GROWTH,AFFECTING MANAGEM.OF MOTHER,DELIVERED	195
30	V240	לידת חוץ	3915
31	65231	מנח רוחבי	1793
32	65241	מצג מצח/פנים	415
33	66031	DEEP TRANSVERSE	1306
34	65281	COMPOUND PRESENTATION	1312
35	65221	עכוז שלם	6716
36	6522	עכוז חלקי	3818
37	65341	אי התאמת ראש/אגן	666
38	66201	אי התקדמות הלידה בשלב 1	4267
39	66221	אי התקדמות הלידה בשלב 2	3703
40	64121	הפרדות מוקדמת של שיליה	1869
41	64111	שלית פתח	976
42	66301	שמט חבל הטבור	912
43	66331	חבל טבור סביב	33050
44	66321	קשר אמיתי של חבל טבור	2634
45	64421	לידה מוקדמת	20007
46	65101	לידת תאומים	7680
47	65631	FETAL DISTRESS, AFFECTING MANAGEMENT OF MOTHER, DELIVERED	4893
48	65681	מקוניום	36633
49	65643		1845
50	65641	לידת מת תוך לידה	200
51	66612	דמם לאחר לידה	1358
52	66702	אי הפרדת השליה	1140
53	66712	שליה בלתי שלמה	2052
54	66401	קרע החיץ דרגה 1	32506
55	66421	קרע החיץ דרגה 3	234
56	66531	קרע צואר הרחם	643
57	66511	קרע ברחם	136
58	66411	קרע החיץ דרגה 2	3603
60	Z7534	ניטור	210390
61	Z731	גרימת לידה בשיטת EMBREY	14797
62	Z734	גרימת לידה ע"י אוקסיטוצין	3755
65	z7301	פיקוע מים	1163
66	65911	FAILED INDUCTION	811
67	Z736	חיתוך החיץ ותפירה	40358
68	Z754	הוצאה ידנית של השליה ובקורת	1707
69	Z757	בקורת חלל הרחם הצואר/הצלקת	8770
70	Z7569	תפירה קרע החיץ דרגה 2,1	36367
71	Z7562	תפירת קרע החיץ דרגה 3	303
72	Z7551	תפירה קרע הצואר	632
73	Z751	LATE AMNINOCENTESIS	2200
74	Z99991	PARACERVICAL/PUDENDAL BLOCK	214
75	Z99992	הרדמה אפידורלית	30613
76	Z99990	הרדמה כללית	29826
80	650	לידה עצמונית	190878
82	Z720	מלקחיים	169
83	Z7252	ASSISTED BREECH DELIVERY	1734
84	Z7254	TOTAL BREECH EXTRACTION	459
85	Z7322	סיבוב פנימי	22
86	Z741	ניתוח קיסרי	33595
87	Z740	נתוח קיסרי	907
88	Z6632	קשירת חצוצרות	3521
89	Z9911	קבלה ANTI D	16090
90	Z9904	קבלה עירוי דם	3470
101	0239	BRUCELLOSIS, UNSPECIFIED	15
102	0410	STREPTOCOCCUS INFECTION (ADDITIONAL CODE)	20
103	04100	STREPTOCOCCUS INFEC., UNSP.	16
104	04101	STREPTOCOCCUS INFEC., GROUP A	27
105	04102	STREPTOCOCCUS INFEC., GROUP B	3139
106	04104	STREPTOCOCCUS INFEC., GROUP D (ENTEROCOCCUS)	167
107	04109	OTHER STREPTOCOCCUS INFEC.	43
108	04111	STAPHYLOCOCCUS AUREUS INFEC.	80
109	04119	OTHER STAPHYLOCOCCUS INFECTION	137
110	0412	PNEUMOCOCCUS INFECTION, UNSP. SITE	17
111	0414	ESCHERICHIA COLI (E. COLI), UNSP. SITE	4424
112	0416	PROTEUS (MIRABILIS,MORGANII), UNSP. SITE	718
113	0417	PSEUDOMONAS INFEC., UNSP. SITE	179
114	0418	OTHER SPEC. BACTERIAL INFECTIONS	33
115	04181	OTHER MYCOPLASMA INFECTION	13
116	04184	OTHER ANAEROBES INFECTION	30
117	04185	OTHER GRAM-NEGATIVE ORGANISMS INFECTION	51
118	04189	OTHER SPECIFIED BACTERIA INFECTION	2096
119	042	HUMAN IMMUNODEFIC. VIRUS (HIV) DIS. /AIDS	24
120	0529	VARICELLA WITHOUT MENTION OF COMPLICATION	41
121	05410	GENITAL HERPES, UNSPECIFIED	87
122	0549	HERPES SIMPLEX WITHOUT MENTION OF COMPLICATION	30
123	0703	VIRAL HEPATITIS B WITHOUT MENTION OF HEPATIC COMA	38
124	07030	VIRAL HEPATITIS B WITHOUT HEPATIC COMA,AC/UNSP.WITHOUT HEP. DELTA	48
125	07051	AC/UNSP. HEPATITIS C WITHOUT HEPATIC COMA	12
126	0709	UNSP. VIRAL HEPATITIS WITHOUT HEPATIC COMA	13
127	0781	VIRAL WARTS	23
128	07811	CONDYLOMA ACUMINATUM	80
129	0785	CYTOMEGALOVIRAL DISEASE	93
130	0971	LATENT SYPHILIS, UNSPECIFIED	140
131	1121	CANDIDIASIS OF VULVA AND VAGINA	55
132	1125	DISSEMINATED CANDIDIASIS	15
133	1129	CANDIDIASIS OF UNSPECIFIED SITE	18
134	123	OTHER CESTODE INFECTION	119282
135	1309	TOXOPLASMOSIS, UNSPECIFIED	15
136	1330	SCABIES	23
137	138	LATE EFFECTS OF ACUTE POLIOMYELITIS	58
138	2198	BENIGN NEOPLASM OF OTHER SPECIFIED PARTS OF UTERUS	27
139	220	BENIGN NEOPLASM OF OVARY	120
140	2273	BENIGN NEOPLASM OF PITUITARY GLAND AND CRANIOPHARYNGEAL DUCT	13
141	22809	HEMANGIOMA OF OTHER SITES	12
142	23770	NEUROFIBROMATOSIS, UNSPECIFIED	33
143	2409	GOITER, UNSPECIFIED	91
144	24200	TOXIC DIFFUSE GOITER WITHOUT MENTION OF THYROTOXIC CRISIS	14
145	2429	THYROTOXICOSIS WITHOUT MENTION OF GOITER OR OTHER CAUSE	49
146	24290	THYROTOXICOSIS WITHOUT GOITER; HYPERTHYROIDISM	184
147	2449	UNSPECIFIED ACQUIRED HYPOTHYROIDISM	1478
148	2452	CHRONIC LYMPHOCYTIC THYROIDITIS	70
149	25000	ADULT-ONSET TYPE DIABETES MELLITUS WHITHOUT COMPLICATION	1294
150	25001	JUVENILE TYPE DIABETES MELLITUS WITHOUT MENTION OF COMPLICATION	162
151	25051	JUVENILE DIABETES + OPHTHALMIC MANIFES. ,NOT STATED AS UNCONTROLL	20
152	2531	OTHER AND UNSPECIFIED ANTERIOR PITUITARY HYPERFUNCTION	62
153	2564	POLYCYSTIC OVARIES	22
154	2662	OTHER B-COMPLEX DEFICIENCIES	94
155	2710	GLYCOGENOSIS	72
156	2720	PURE HYPERCHOLESTEROLEMIA	18
157	2773	AMYLOIDOSIS	258
158	2774	DISORDERS OF BILIRUBIN EXCRETION	20
159	2822	ANEMIAS,DISORDERS OF GLUTATHIONE METABOLISM (G-6-P-D-)	31
160	2822 1	G-6-PD DEFICIENCY	125
161	2824	THALASSEMIAS	317
162	2858	OTHER SPECIFIED ANEMIAS	14
163	2859	אנמיה	40630
164	2863	CONGENITAL DEFICIENCY OF OTHER CLOTTING FACTORS	407
165	2865	HEMORRHAGIC DISORDER DUE TO CIRCULATING ANTICOAGULANTS	23
166	2873	PRIMARY THROMBOCYTOPENIA	118
167	2875	THROMBOCYTOPENIA, UNSPECIFIED	1258
168	2895	OTHER DISEASES OF SPLEEN	25
169	2898	OTHER SPECIFIED DISEASES OF BLOOD AND BLOOD-FORMING ORGANS	18
170	2899	UNSPECIFIED DISEASES OF BLOOD AND BLOOD-FORMING ORGANS	35
171	2959	UNSPECIFIED SCHIZOPHRENIA	18
172	29590	UNSPECIFIED TYPE SCHIZOPHRENIA, UNSPECIFIED STATE	84
173	2989	UNSPECIFIED PSYCHOSIS	27
174	30000	ANXIETY STATE, UNSPECIFIED	194
175	30001		54
176	3009	UNSPECIFIED NEUROTIC DISORDER	30
177	30401	OPIOID TYPE DEPENDENCE, CONTINUOUS USE	27
178	3051	TOBACCO USE DISORDER (TOBACCO DEPENDENCE)	2802
179	311	DEPRESSIVE DISORDER, NOT ELSEWHERE CLASSIFIED	175
180	319	UNSPECIFIED MENTAL RETARDATION	38
181	3459	EPILEPSY, UNSPECIFIED	179
182	34590	EPILEPSY, UNSP. WITHOUT INTRACTABLE EPILEPSY	463
183	34591	EPILEPSY UNSP. WITH INTRACTABLE EPILEPSY	53
184	34690	MIGRAINE, UNSPECIFIED, WITHOUT INTRACTABEL MIGRAINE	48
185	3482	BENIGN INTRACRANIAL HYPERTENSION	24
186	3490	REACTION TO SPINAL OR LUMBAR PUNCTURE	255
187	3510	BELL'S PALSY	45
188	3540	CARPAL TUNNEL SYNDROME	23
189	3619	UNSPECIFIED RETINAL DETACHMENT	21
190	36201	BACKGROUND DIABETIC RETINOPATHY	30
191	36211	HYPERTENSIVE RETINOPATHY	48
192	36274	PIGMENTARY RETINAL DYSTROPHY	14
193	3671	MYOPIA	76
194	36900	BLINDNESS OF BOTH EYES, IMPAIRMENT LEVEL NOT FURTHER SPECIFIED	21
195	36960	BLINDNESS, ONE EYE, NOT OTHERWISE SPECIFIED	53
196	3829	UNSPECIFIED OTITIS MEDIA	17
197	3897	DEAF MUTISM, NOT ELSEWHERE CLASSIFIABLE	75
198	3899	UNSPECIFIED HEARING LOSS	68
199	390	RHEUMATIC FEVER WITHOUT MENTION OF HEART INVOLVEMENT	187
200	3940	MITRAL STENOSIS	27
201	3941	RHEUMATIC MITRAL INSUFFICIENCY	49
202	3942	MITRAL STENOSIS WITH INSUFFICIENCY	38
203	3951	RHEUMATIC AORTIC INSUFFICIENCY	14
204	3960	MITRAL VALVE STENOSIS AND AORTIC VALVE STENOSIS	19
205	3963	MITRAL VALVE INSUFFICIENCY AND AORTIC VALVE INSUFFICIENCY	58
206	3970	DISEASES OF TRICUSPID VALVE	177
207	39890	RHEUMATIC HEART DISEASE, UNSPECIFIED	57
208	4151	PULMONARY EMBOLISM AND INFARCTION	21
209	4160	PRIMARY PULMONARY HYPERTENSION	23
210	4168	OTHER CHRONIC PULMONARY HEART DISEASES	46
211	4178	OTHER SPECIFIED DISEASES OF PULMONARY CIRCULATION	16
212	4240	MITRAL VALVE DISORDERS	424
213	4241	AORTIC VALVE DISORDERS	76
214	4242	TRICUSPID VALVE DISORDERS, SPECIFIED AS NONRHEUMATIC	56
215	4267	ANOMALOUS ATRIOVENTRICULAR EXCITATION	20
216	4270	PAROXYSMAL SUPRAVENTRICULAR TACHYCARDIA	30
217	42769	OTHER PREMATURE BEATS	31
218	42789	OTHER SPECIFIED CARDIAC DYSRHYTHMIAS	127
219	4279	CARDIAC DYSRHYTHMIA, UNSPECIFIED	53
220	4538	EMBOLISM AND THROMBOSIS OF OTHER SPECIFIED VEINS	15
221	4539	EMBOLISM AND THROMBOSIS OF UNSPECIFIED SITE	108
222	463	ACUTE TONSILLITIS	16
223	4659	ACUTE UPPER RESPIRATORY INFECTIONS OF UNSPECIFIED SITE	268
224	481	PNEUMOCOCCAL PNEUMONIA (STREPTOCOCUUS PNEUMONIAE PNEUMONIA)	13
225	486	PNEUMONIA, ORGANISM UNSPECIFIED	209
226	4919	UNSPECIFIED CHRONIC BRONCHITIS	20
227	49390	ASTHMA,UNSPECIFIED TYPE,WITHOUT MENTION OF STATUS ASTHMATICUS OR	3163
228	5184	ACUTE EDEMA OF LUNG, UNSPECIFIED	22
229	53190	GASTRIC ULCER,UNSP.WITHOUT HEMOR.PERFOR.WITHOUT OBSTRUCTION	23
230	53290	DUODENAL ULCER,AC./CHR.WITHOUT HEMORR.PERFOR.OR OBSTRUCTION	49
231	53390	PEPTIC ULCER AC./CHR.WITHOUT HEMORR.PERFOR.OR OBSTRUCTION	42
232	5369	UNSPECIFIED FUNCTIONAL DISORDER OF STOMACH	34
233	55090	UNIL./UNSP.INGUINAL HERNIA, WITHOUT OBSTR.OR GANGRENE	31
234	5531	UMBILICAL HERNIA	281
235	5533	DIAPHRAGMATIC HERNIA WITHOUT MENTION OF OBSTRUCTION OR GANGRENE	30
236	5559	REGIONAL ENTERITIS OF UNSPECIFIED SITE	98
237	556	ULCERATIVE COLITIS	28
238	5569	ULCERATIVE COLITIS, UNSPECIFIED	46
239	5589	OTHER & UNSPEC.NONINFECTIOUS GASTROENTERITIS & COLITIS	67
240	5601	PARALYTIC ILEUS	60
241	5680	PERITONEAL ADHESIONS (POSTOPERATIVE)(POSTINFECTION)	329
242	5718	OTHER CHRONIC NONALCOHOLIC LIVER DISEASE	32
243	57420	CHOLELITHIASIS WITHOUT CHOLECYSTITIS OR OBSTRUCTION	119
244	5790	CELIAC DISEASE	124
245	5819	NEPHROTIC SYNDROME WITH UNSP.PATHOLOGICAL LESION IN KIDNEY	16
246	59080	PYELONEPHRITIS, UNSPECIFIED	139
247	591	HYDRONEPHROSIS	236
248	5920	CALCULUS OF KIDNEY	203
249	5935	HYDROURETER	12
250	5990	URINARY TRACT INFECTION, SITE NOT SPECIFIED	832
251	61172	LUMP OR MASS IN BREAST	68
252	6146	PELVIC PERITONEAL ADHESIONS, FEMALE (POSTOPERATIVE/POSTINFECTION)	4804
253	6160	CERVICITIS AND ENDOCERVICITIS	56
254	61610	VAGINITIS AND VULVOVAGINITIS, UNSPECIFIED	2724
255	6162	CYST OF BARTHOLIN'S GLAND	12
256	6171	ENDOMETRIOSIS OF OVARY	28
257	6200	FOLLICULAR CYST OF OVARY	16
258	6201	CORPUS LUTEUM CYST OR HEMATOMA	25
259	6202	OTHER AND UNSPECIFIED OVARIAN CYST	81
260	6208	NONINFLAMM.DISORDERS OF OVARY,FALLOP.TUBE,BROAD LIGAMENT	45
261	6220	EROSION AND ECTROPION OF CERVIX	37
262	6221	DYSPLASIA OF CERVIX (UTERI)	36
263	6227	MUCOUS POLYP OF CERVIX	33
264	6251	VAGINISMUS	129
265	6331	TUBAL PREGNANCY	417
266	6338	OTHER ECTOPIC PREGNANCY	12
267	64131	ANTEPART.HEMORRHAGE ASSOCIATED WITH COAGULATION DEFECTS,DELIVERED	123
268	64232	TRANS.HYPERTENSION OF PREGNANCY,WITH DELIVERY,WITH POSTP.COMPL.	23
269	64242	MILD OR UNSP.PRE-ECLAMPSIA,WITH DELIVERY,WITH POSTPART.COMPL.	61
270	64252	SEVERE PRE-ECLAMPSIA,WITH DELIVERY,WITH POSTPARTUM COMPLICATION	21
271	64261	ECLAMPSIA, WITH DELIVERY	78
272	64262	ECLAMPSIA,WITH DELIVERY,WITH POSTPARTUM COMPLICATION	17
273	64391	UNSPECIFIED VOMITING OF PREGNANCY, DELIVERED	52
274	64400	THREATENED PREMATURE LABOR, UNSPECIFIED AS TO EPISODE OF CARE	13
275	64403	THREATENED PREMATURE LABOR, ANTEPARTUM	306
276	64511	POST TERM PREGNANCY ,WITH DELIVERY	41064
279	64521	PROLONGED PREGNANCY, WITH DELIVERY	11091
280	64611	EDEMA OR EXC.WEIGHT GAIN ,WITH DELIVERY,WITH/WITHOUT ANTEPART.COMPL.	2082
281	64621	UNSPECIFIED RENAL DISEASE IN PREGNANCY, WITH DELIVERY	25
282	64651	ASYMPTOMATIC BACTERIURIA IN PREGNANCY, WITH DELIVERY	312
283	64652	ASYMPTOMAT.BACTERIURIA IN PREGN.,WITH DELIVERY,WITH POSTP.COMPL.	287
284	64653	ANTEPARTUM ASYMPTOMATIC BACTERIURIA	5062
285	64661	INFECTIONS OF GENITOURINARY TRACT IN PREGNANCY, WITH DELIVERY	734
286	64662	INFECT.OF GENITOURINARY TR.IN PREGN.,WITH DELIV.,WITH POSTP.COMPL.	568
287	64663	ANTEPARTUM INFECTIONS OF GENITOURINARY TRACT	4670
288	64671	LIVER DISORDERS IN PREGNANCY, WITH DELIVERY	88
289	64681	OTHER SPECIFIED COMPLICATIONS OF PREGNANCY, WITH DELIVERY	544
290	64682	OTHER SPEC.COMPLICATIONS OF PREGN.,WITH DELIVERY,WITH POSTP.COMPL.	18
291	64701	SYPHILIS OF MOTHER, COMPLICATING PREGNANCY, WITH DELIVERY	134
292	64731	TUBERCULOSIS OF MOTHER, WITH DELIVERY	13
293	64761	OTHER VIRAL DISEASES OF MOTHER, WITH DELIVERY	380
294	64762	OTHER VIRAL DIS.OF MOTHER,WITH DELIVERY,WITH POSTPARTUM COMPL.	23
295	64763	OTHER ANTEPARTUM VIRAL DISEASES	61
296	64781	OTHER SPEC.INFECTIOUS AND PARASITIC DIS.OF MOTHER,WITH DELIVERY	26
297	64782	OTHER SPEC.INFECT.+PARAS.DISEASES,WITH DELIV.,WITH POSTP.COMPL.	25
298	64783	OTHER SPEC.INFECTIOUS AND PARASITIC DIS. OF MOTHER,ANTEPARTUM	32
299	64811	THYROID DYSFUNCTION OF MOTHER, WITH DELIVERY	2467
300	64821	ANEMIA OF MOTHER, WITH DELIVERY	5832
301	64822	אנמיה	61059
302	64823	ANTEPARTUM ANEMIA	566
303	64824	POSTPARTUM ANEMIA	673
304	64831	DRUG DEPENDENCE OF MOTHER, WITH DELIVERY	94
305	64841	MENTAL DISORDERS OF MOTHER, WITH DELIVERY	810
306	64842	MENTAL DISORDERS OF MOTHER,WITH DELIVERY,WITH POSTPARTUM COMPL.	41
307	64851	CONGENITAL CARDIOVASCULAR DISORDERS OF MOTHER, WITH DELIVERY	170
308	64861	OTHER CARDIOVASCULAR DISEASES OF MOTHER, WITH DELIVERY	1327
309	64862	CARDIOVASCULAR DIS.OF MOTHER,WITH DELIVERY,WITH POSTP.COMPL.	47
310	64871	BONE AND JOINT DISORDERS ,WITH DELIVERY	196
311	64872	BONE AND JOINT DISORDERS,WITH DELIVERY,WITH POSTP.COMPLICATION	13
312	64891	OTHER CURRENT CONDITIONS OF MOTHER,WITH DELIVERY	80
313	65111	TRIPLET PREGNANCY, DELIVERED	331
314	65131	TWIN PREG.WITH FETAL LOSS & RETENTION OF 1 FETUS, DELIVERED	113
315	65133	TWIN PREG.WITH FETAL LOSS & RETEN.OF 1 FET.ANTEPART.CONDITION	108
316	65201	UNSTABLE LIE, DELIVERED	62
317	65213	BREECH/MALPRES.SUCCESSF.CONVERT.TO CEPHALIC PRES.,ANTEPARTUM	63
318	65251	HIGH HEAD AT TERM, DELIVERED	61
319	65271	PROLAPSED ARM OF FETUS, DELIVERED	35
320	65401	CONGENITAL ABNORMALITIES OF UTERUS, WITH DELIVERY	1217
321	65411	RH-ISOIMMUNISATION	1310
322	65441	ABNORMALITIES IN SHAPE OR POSITION OF GRAVID UTERUS,DELIVERED	378
323	65461	CONGENITAL OR ACQUIRED ABNORMALITY OF CERVIX,WITH DELIVERY	96
324	65471	CONGENITAL OR ACQUIRED ABNORMALITY OF VAGINA, WITH DELIVERY	208
325	65481	CONGENITAL OR ACQUIRED ABNORMALITY OF VULVA, WITH DELIVERY	29
326	65491	UNSP.ABNORMALITY OF ORGANS OF PELVIS,WITH DELIVERY	111
327	65501	CENTRAL NERVOUS SYSTEM MALFORMATION IN FETUS, WITH DELIVERY	800
328	65511	CHROMOS.ABNORM.IN FETUS,AFFECT.MANAGEM.OF MOTHER.WITH DELIV.	326
329	65521	HERED.DIS.IN FAMILY,AFFECING MANAGEM.OF MOTHER,WITH DELIVERY	19
330	65571	DECREASED FETAL MOVEMENTS, AFFECTING MOTHER, DELIVERED	466
331	65581	OTHER KNOWN OR SUSP.FETAL ABNORMALITY,AFFECT.MOTHER,DELIVERED	12890
332	65591	UNSPECIF.SUSP.FETAL ABNORMALITY, AFFECTING MOTHER,DELIVERED	547
333	65663	EXCESSIVE FETAL GROWTH,AFFECTING MANAGEM.OF MOTHER,ANTEPARTUM	29
334	65671	PLACENTAL CONDITIONS,AFFECTING MANAGEM.OF MOTHER,DELIVERED	819
335	65821	ירידת מים מעל 24 שבועות	1263
336	65841	INFECTION OF AMNIOTIC CAVITY, DELIVERED	1911
337	65901	FAILED MECHANICAL INDUCTION OF LABOR, DELIVERED	898
338	65903	FAILED MECHANICAL INDUCTION OF LABOR, ANTEPARTUM	25
339	65913	FAILED MEDICAL OR UNSPECIFIED INDUCTION OF LABOR, ANTEPARTUM	24
340	65921	UNSPECIFIED TYPE MATERNAL PYREXIA DURING LABOR, DELIVERED	341
341	65931	GENERALIZED INFECTION DURING LABOR, DELIVERED	23
342	65951	ELDERLY PRIMIGRAVIDA, DELIVERED	457
343	65961	OTHER ADVANCED MATERNAL AGE, WITH DELIVERY	12964
344	65971	סבל עוברי	6215
345	65981	IDICATION FOR CARE/INTERVENT.RELATED TO LABOR+DELIVERY,DELIV.	316
346	66001	OBSTR.BY MALPOSITION OF FETUS AT ONSET OF LABOR,WITH DELIVERY	119
347	66041	SHOULDER (GIRDLE) DYSTOCIA, WITH DELIVERY	445
348	66071	UNSPECIFIED FAILED FORCEPS OR VACUUM EXTRACTOR, WITH DELIVERY	268
349	66111	SECONDARY UTERINE INERTIA, WITH DELIVERY	59
350	66121	OTHER AND UNSPECIFIED UTERINE INERTIA, WITH DELIVERY	77
351	66131	PRECIPITATE LABOR, WITH DELIVERY	160
352	66141	HYPERTONIC,INCOORDINATE,PROL.UTERINE CONTRACTIONS,WITH DELIVERY	11
353	66311	CORD AROUND NECK,WITH COMPRESS.,COMPLIC.LABOR+DELIV.,DELIVERED	348
354	66341	SHORT CORD COMPLICATING LABOR AND DELIVERY, DELIVERED	555
355	66351	VASA PREVIA COMPLICATING LABOR AND DELIVERY, DELIVERED	257
356	66381	UMBILICAL CORD COMPLICATIONS DURING LABOR+DELIVERY,DELIVERED	388
357	66451	VULVAR AND PERINEAL HEMATOMA, WITH DELIVERY	29
358	66541	HIGH VAGINAL LACERATION, WITH DELIVERY	58
359	66551	OTHER INJURY TO PELVIC ORGANS, WITH DELIVERY	82
360	66571	PELVIC HEMATOMA, WITH DELIVERY	19
361	66572	PELVIC HEMATOMA, DELIVERED WITH POSTPARTUM COMPLICATION	14
362	66600	THIRD-STAGE POSTPARTUM HEMORRHAGE,UNSPECIFIED EPISODE OF CARE	69
363	66622	DELAYED AND SECONDARY POSTPARTUM HEMORRHAGE, WITH DELIVERY	12
364	66632	POSTPARTUM COAGULATION DEFECTS, WITH DELIVERY	259
365	66882	COMPL.OF ANESTHES.IN LABOR+DELIV.,DELIVERED,WITHPOSTP.COMPL.	261
366	66891	UNSP.COMPLIC.OF ANESTHESIA/SEDATION IN LABOR+DELIV.,DELIVERED	13
367	66911	OBSTETRIC SHOCK,WITH DELIVERY,WITH/WITHOUT ANTEPARTUM CONDIT.	71
368	66922	MATERNAL HYPOTENSION SYND.WITH DELIVERY,WITH POSTPART.CONDIT.	17
369	66971	CESAR.DELIV.,WITHOUT INDICAT.,DELIV.,WITH/WITHOUT ANTEPART.COND.	1194
370	66981	COMPL.OF LABOR+DELIVERY,DELIVERED,WITH/WITHOUT ANTEPARTUM COND.	238
371	67000	MAJOR PUERPERAL INFECTION, UNSPECIFIED AS TO EPISODE OF CARE	48
372	67002	חום עם סיבה ידועה	1140
373	67101	VARICOSE VEINS OF LEGS,WITH DELIVERY,WITH/WITHOUT ANTEP.COND.	3655
374	67102	VARICOSE VEINS OF LEGS,WITH DELIVERY,WITH POSTPARTUM COMPLICATION	74
375	67111	VARIC.VEINS OF VULVA+PERIN.WITH DELIV.,WITH/WITHOUT ANTEP.CONDIT.	101
376	67121	SUPERF.THROMBOPHLEBITIS WITH DELIVERY,WITH/WITHOUT ANTEP.COND.	80
377	67122	SUPERF.THROMBOPHLEBITIS WITH DELIVERY,WITH POSTPARTUM COMPL.	358
378	67131	DEEP PHLEBOTHROMBOSIS, ANTEPARTUM, WITH DELIVERY	55
379	67133	DEEP PHLEBOTHROMBOSIS, ANTEPARTUM	18
380	67142	DEEP PHLEBOTHROMBOSIS, POSTPARTUM, WITH DELIVERY	38
381	67181	VENOUS COMPLICAT.,WITH DELIVERY,WITH/WITHOUT ANTEPART.CONDITION	23
382	67182	VENOUS COMPLICATIONS,WITH DELIVERY,WITH POSTPARTUM COMPLICATION	86
383	67202	חום	1040
384	67410	DISRUPTION OF CESAREAN WOUND,UNSPECIFIED EPISODE OF CARE	310
385	67412	DISRUPTION OF CESAREAN WOUND,WITH DELIVERY,WITH POSTPART.COMPL.	41
386	67422	DISRUPTION OF PERINEAL WOUND,WITH DELIVERY,WITH POSTPART.COMPL.	11
387	67432	COMPLIC.OBSTETRICAL SURG.WOUNDS,DELIVERED,WITH POSTP.COMPLIC.	1100
388	67522	NONPURULENT MASTITIS WITH CHILDBIRTH,DELIVERED,WITH POSTP.COMPL.	19
389	67622	ENGORGEMENT OF BREASTS WITH CHILDBIRTH,DELIVERED,WITH POSTP.COMPL.	44
390	6822	CELLULITIS AND ABSCESS OF TRUNK	12
391	6929	CONTACT DERMATITIS AND OTHER ECZEMA, UNSPECIFIED CAUSE	46
392	6961	OTHER PSORIASIS AND SIMILAR DISORDERS	152
393	6981	PRURITUS OF GENITAL ORGANS	14
394	6982	PRURIGO	98
395	6989	UNSPECIFIED PRURITIC DISORDER	528
396	7090	DYSCHROMIA	42
397	70901	VITILIGO	56
398	7100	SYSTEMIC LUPUS ERYTHEMATOSUS	93
399	7140	RHEUMATOID ARTHRITIS	42
400	71965	OTHER SYMPTOMS REFERABLE TO JOINT OF PELVIC REGION AND THIGH	184
401	7222	DISPLACEM.OF INTERVERTEB.DISC, SITE UNSP.WITHOUT MYELOPATHY	26
402	73730	SCOLIOSIS (AND KYPHOSCOLIOSIS), IDIOPATHIC	101
403	7454	VENTRICULAR SEPTAL DEFECT	73
404	7455	OSTIUM SECUNDUM TYPE ATRIAL SEPTAL DEFECT	29
405	7464	CONGENITAL INSUFFICIENCY OF AORTIC VALVE	19
406	7475	שני כלי דם בחבל הטבור	995
407	7520	CONGENITAL ANOMALIES OF OVARIES	12
408	75211	EMBRYONIC CYST OF FALLOPIAN TUBES AND BROAD LIGAMENTS	131
409	7522	DOUBLING OF UTERUS	242
410	7523	OTHER CONGENITAL ANOMALIES OF UTERUS	264
411	7523 1	BICORNUATE UTERUS	326
412	75249	CONG.ANOMALIES OF CERVIX, VAGINA, AND EXT.FEMALE GENITALIA	46
413	7530	RENAL AGENESIS & DYSGENESIS	15
414	7533	OTHER SPECIFIED CONGENITAL ANOMALIES OF KIDNEY	53
415	7799	CONDITION ORIGINATING IN THE PERINATAL PERIOD,STILLBIRTH	496
416	7802	SYNCOPE AND COLLAPSE	23
417	7821	RASH AND OTHER NONSPECIFIC SKIN ERUPTION	42
418	7824	JAUNDICE, UNSPECIFIED, NOT OF NEWBORN	21
419	7834	LACK OF EXPECTED NORMAL PHYSIOLOGICAL DEVELOPMENT IN CHILDHOOD	2562
420	78343	SHORT STATURE	11418
421	7840	HEADACHE	40
422	7850	TACHYCARDIA, UNSPECIFIED	41
423	78791	DIARRHEA	47
424	7880	RENAL COLIC	38
425	7890	ABDOMINAL PAIN	13
426	78909	ABDOMINAL PAIN, OTHER SPECIFIED SITE	72
427	7892	SPLENOMEGALY	16
428	7904	NONSPECIFIC ELEVATION OF LEVELS OF TRANSAMINASE OR LDH	362
429	7909	OTHER NONSPECIFIC FINDINGS ON EXAMINATION OF BLOOD	72
430	79099	OTHER NONSPECIFIC FINDINGS ON EXAMINATION OF BLOOD	1615
431	79579	OTHER & UNSP. NONSPEC. IMMUNOLOGICAL FINDINGS	198
432	920	CONTUSION OF FACE, SCALP, AND NECK EXCEPT EYE(S)	32
433	9222	CONTUSION OF ABDOMINAL WALL	81
434	9953	ALLERGY, UNSPECIFIED, NOT ELSEWHERE CLASSIFIED	16
435	99581	ADULT PHYSICAL ABUSE	17
436	9974	DIGESTIVE SYSTEM COMPLICATIONS N.E.C.	16
437	9998	OTHER TRANSFUSION REACTION, NOT ELSEWHERE CLASSIFIED	20
438	E819	MOTOR VEHICLE TRAFFIC ACCIDENT OF UNSPECIFIED NATURE	17
439	E8190	MOTOR VEHICLE TRAFFIC ACCIDENT OF UNSPECIFIED NATURE	28
440	E8497	ACCIDENTS OCCURRING IN RESIDENTIAL INSTITUTION	27
441	E888	OTHER AND UNSPECIFIED ACCIDENTAL FALL	38
442	E9303	ERYTHROMYCIN AND OTHER MACROLIDES CAUSING ADVERSE EFFECTS IN	24
443	E9304	TETRACYCLINE GROUP CAUSING ADVERSE EFFECTS IN THERAPEUTIC USE	20
444	E9308	OTHER SPECIFIED ANTIBIOTICS CAUSING ADVERSE EFFECTS IN	75
445	E9309	UNSPECIFIED ANTIBIOTIC CAUSING ADVERSE EFFECTS IN THERAPEUTIC	21
446	E9320	ADRENAL CORTICAL STEROIDS CAUSING ADVERSE EFFECTS IN	84
447	E9342	ANTICOAGULANTS CAUSING ADVERSE EFFECTS IN THERAPEUTIC USE	60
448	E9352	OTHER OPIATES AND RELATED NARCOTICS CAUSING ADVERSE EFFECTS IN	12
449	E9353	SALICYLATES CAUSING ADVERSE EFFECTS IN THERAPEUTIC USE	47
450	E9354	AROMATIC ANALGESICS, NOT ELSEWHERE CLASSIFIED, CAUSING ADVERSE	15
451	E9355	PYRAZOLE DERIVATIVES CAUSING ADVERSE EFFECTS IN THERAPEUTIC	50
452	E9356	ANTIRHEUMATICS (ANTIPHLOGISTICS) CAUSING ADVERSE EFFECTS IN	56
453	E9385	SURFACE AND INFILTRATION ANESTHET.CAUSING ADV.EFF IN THERAP.USE	11
454	E9412	SYMPATHOMIMETICS (ADRENERGICS) CAUSING ADVERSE EFFECTS	47
455	E9460	LOCAL ANTI-INFECTIVES AND ANTI-INFLAMMATORY DRUGS CAUSING	15
456	p10	חשד ל- I.U.G.R	4845
457	p63	גרימת לידה ע"י P.G	10891
458	p64	החשת לידה ע"י אוקסיטוצין	46235
459	p77	Brstim	2822
460	v0251	CARRIER OR SUSP. CARRIER OF GROUP B STREPTOCOCCUS	339
461	V026	CARRIER OR SUSPECTED CARRIER OF VIRAL HEPATITIS	373
462	V0261	HEPATITIS B CARRIER	359
463	V0262	HEPATITIS C CARRIER	126
464	V0269	OTHER VIRAL HEPATITIS CARRIER	19
465	V103	PERSONAL HISTORY OF MALIGNANT NEOPLASM OF BREAST	18
466	V1043	PERSONAL HISTORY OF MALIGNANT NEOPLASM OF OVARY	15
467	V1072	PERSONAL HISTORY OF HODGKIN'S DISEASE	23
468	V1087	PERSONAL HISTORY OF MALIGNANT NEOPLASM OF THYROID	70
469	V120	PERSONAL HISTORY OF INFECTIOUS & PARASITIC DISEASES	35
470	V1201	PERSONAL HISTORY OF TUBERCULOSIS	42
471	V140	PERSONAL HISTORY OF ALLERGY TO PENICILLIN	5487
472	V141	PERSONAL HISTORY OF ALLERGY TO OTHER ANTIBIOTIC AGENT	2095
473	V142	PERSONAL HISTORY OF ALLERGY TO SULFONAMIDES	777
474	V143	PERSONAL HISTORY OF ALLERGY TO OTHER ANTI-INFECTIVE AGENT	32
475	V144	PERSONAL HISTORY OF ALLERGY TO ANESTHETIC AGENT	29
476	V146	PERSONAL HISTORY OF ALLERGY TO ANALGESIC AGENT	1721
477	V148	PERSONAL HISTORY OF ALLERGY TO SPECIFIED MEDICINAL AGENTS	840
478	V149	PERSONAL HISTORY OF ALLERGY TO UNSPECIFIED MEDICINAL AGENT	45
479	V150	PERSONAL HISTORY OF ALLERGY,OTHER THAN TO MEDICINAL AGENTS	96
480	V1505	PERSONAL HISTORY OF ALLERGY TO OTHER FOODS	68
481	V1509	PERSONAL HISTORY OF ALLERGY , OTHER THAN TO MEDICINAL AGENTS	35
482	V151	PERSONAL HISTORY OF SURGERY TO HEART AND GREAT VESSELS,	220
483	V1582	PERSONAL HISTORY OF TOBACCO USE	96
484	V1589	OTHER SPECIFIED PERSONAL HISTORY PRESENTING HAZARDS TO HEALTH	46
485	V160	FAMILY HISTORY OF MALIGNANT NEOPLASM OF GASTROINTESTINAL TRACT	14
486	V163	FAMILY HISTORY OF MALIGNANT NEOPLASM OF BREAST	41
487	V180	FAMILY HISTORY OF DIABETES MELLITUS	16369
488	V195	FAMILY HISTORY OF CONGENITAL ANOMALIES	24
489	V221	SUPERVISION OF OTHER NORMAL PREGNANCY	130
490	V222	PREGNANT STATE, INCIDENTAL	89
491	V231	SUPERVIS.OF HIGH-RISK PREGN.:HISTORY OF TROPHOBLASTIC DISEASE	495
492	V2341	לידות מוקדמות בעבר	24324
493	V2349	עבר מילדותי כושל (אחר)	5252
495	V238	SUPERVISION OF OTHER HIGH-RISK PREGNANCY	1465
496	v2389	SUPERVISION OF OTHER HIGH-RISK PREGNANCY	951
497	V261	ARTIFICIAL INSEMINATION	308
498	V268	IN VITRO FERTILIZATION OR TEST TUBE PREGNANCY	2275
499	V270	MOTHER WITH SINGLE LIVEBORN	109709
500	V271	MOTHER WITH SINGLE STILLBORN	958
501	V272	MOTHER WITH TWINS, BOTH LIVEBORN	3810
502	V273	MOTHER WITH TWINS, ONE LIVEBORN AND ONE STILLBORN	85
503	V275	MOTHER WITH OTHER MULTIPLE BIRTH, ALL LIVEBORN	160
504	V288	OTHER SPECIFIED ANTENATAL SCREENING	555
505	V433	HEART VALVE REPLACED BY OTHER MEANS	19
506	V453	POSTSURGICAL INTESTINAL BYPASS OR ANASTOMOSIS STATUS	599
507	V455	PRESENCE OF CONTRACEPTIVE DEVICE	151
508	V4551	PRESENCE OF INTRAUTERINE CONTRACEPTIVE DEVICE	133
509	V584	ENCOUNTER FOR OTHER AFTERCARE FOLLOWING SURGERY	82
510	V5849	ENCOUNTER FOR OTHER SPEC. AFTERCARE FOLLOWING SURGERY	394
511	V588	ENCOUNTER FOR OTHER SPEC. PROCEDURES & AFTERCARE	19
512	V5889	ENCOUNTER FOR OTHER SPEC. AFTERCARE	856
513	V609	UNSPECIFIED HOUSING OR ECONOMIC CIRCUMSTANCE	130
514	V626	REFUSAL OF TREATMENT FOR REASONS OF RELIGION OR CONSCIENCE	2771
515	V629	UNSPECIFIED PSYCHOSOCIAL CIRCUMSTANCE	62
516	V642	SURGICAL OR OTHER PROCED. NOT CARRIED OUT (PATIENT'S DECISION)	544
517	V762	SCREENING FOR MALIGNANT NEOPLASMS OF THE CERVIX	24
518	Z0124	OTHER CRANIOTOMY	37
519	Z0395	SPINAL BLOOD PATCH	41
520	Z0639	OTHER PARTIAL THYROIDECTOMY	293
521	Z064	COMPLETE THYROIDECTOMY	32
522	Z3880	OTHER SURGICAL OCCLUSION OF VESSELS, UNSPECIFIED SITE	37
523	Z3886	OTHER SURGICAL OCCLUSION OF ABDOMINAL ARTERIES	84
524	Z415	TOTAL SPLENECTOMY	154
525	Z470	APPENDECTOMY	2611
526	Z4709	OTHER APPENDECTOMY	280
527	Z5122	CHOLECYSTECTOMY	723
528	Z5123	LAPAROSCOPIC CHOLECYSTECTOMY	149
529	Z5349	OTHER UMBILICAL HERNIORRHAPHY	20
530	Z540	INCISION OF ABDOMINAL WALL	149
531	Z5411	EXPLORATORY LAPAROTOMY	44
532	Z5412	REOPENING OF RECENT LAPAROTOMY SITE	78
533	Z5421	LAPAROSCOPY	14
534	Z545	LYSIS OF PERITONEAL ADHESIONS	584
535	Z5459	OTHER LYSIS OF PERITONEAL ADHESIONS	2664
536	Z554	PARTIAL NEPHRECTOMY	28
537	Z5551	NEPHROURETERECTOMY	86
538	Z5674	URETERONEOCYSTOSTOMY	15
539	Z598	URETERAL CATHETERIZATION	21
540	Z6512	OTHER BIOPSY OF OVARY	22
541	Z6522	WEDGE RESECTION OF OVARY	35
542	Z6529	OTHER LOCAL EXCISION OR DESTRUCTION OF OVARY	268
543	Z65290	OVARIAN CYSTECTOMY	51
544	Z653	UNILATERAL OOPHORECTOMY	68
545	Z6539	OTHER UNILATERAL OOPHORECTOMY	30
546	Z654	UNILATERAL SALPINGO-OOPHORECTOMY	185
547	Z6549	OTHER UNILATERAL SALPINGO-OOPHORECTOMY	63
548	Z6591	ASPIRATION OF OVARY	83
549	Z6601	SALPINGOTOMY	20
550	Z6602	SALPINGOSTOMY	41
551	Z664	TOTAL UNILATERAL SALPINGECTOMY	40
552	Z6661	EXCISION OR DESTRUCTION OF LESION OF FALLOPIAN TUBE	71
553	Z6662	SALPINGECTOMY WITH REMOVAL OF TUBAL PREGNANCY	1051
554	Z6669	OTHER PARTIAL SALPINGECTOMY	22
555	Z6673	SALPINGO-SALPINGOSTOMY	52
556	Z6691	ASPIRATION OF FALLOPIAN TUBE	13
557	Z6692	UNILATERAL DESTRUCTION OR OCCLUSION OF FALLOPIAN TUBE	44
558	Z672	CONIZATION OF CERVIX	71
559	Z6733	DESTRUCTION OF LESION OF CERVIX BY CRYOSURGERY	21
560	Z6822	INCISION OR EXCISION OF CONGENITAL SEPTUM OF UTERUS	22
561	Z6829	OTHER EXCISION OR DESTRUCTION OF LESION OF UTERUS	207
562	Z683	כריתה חלקית של הרחם	24
563	Z684	כריתת רחם	109
564	Z6902	DILATION AND CURETTAGE FOLLOWING DELIVERY OR ABORTION	742
565	Z6941	SUTURE OF LACERATION OF UTERUS	18
566	Z6959	OTHER ASPIRATION CURETTAGE OF UTERUS	22
567	Z6996	REMOVAL OF CERCLAGE MATERIAL FROM CERVIX	324
568	Z7033	EXCISION OR DESTRUCTION OF LESION OF VAGINA	25
569	Z7109	OTHER INCISION OF VULVA AND PERINEUM	19
570	Z713	OTHER LOCAL EXCISION OR DESTRUCTION OF VULVA AND PERINEUM	34
571	Z7271	ואקום + תפירה	2681
572	Z7279	שולפן ריק	4356
573	Z7309	SURGICAL INDUCTION	23979
574	Z7359	OTHER MANUALLY ASSISTED DELIVERY	187
575	Z738	OPERATIONS ON FETUS TO FACILITATE DELIVERY	19
576	Z7391	EXTERNAL VERSION TO ASSIST DELIVERY	161
577	Z7491	HYSTEROTOMY TO TERMINATE PREGNANCY	17
578	Z7499	ניתוח קיסרי אחר	114
579	Z753	OTHER INTRAUTERINE OPER. ON FETUS & AMNION	39
580	Z7533	FETAL BLOOD SAMPLING AND BIOPSY	182
581	Z7535	OTHER DIAGNOSTIC PROCEDURES ON FETUS AND AMNION	314
582	Z7550	REPAIR OF CURRENT OBSTETRIC LACERATION OF UTERUS	37
583	Z7561	REPAIR OF CURRENT OBSTETRIC LACERATION OF BLADDER AND URETHRA	67
584	Z758	OBSTETRIC TAMPONADE OF UTERUS OR VAGINA	39
585	Z7591	EVACUATION OF OBSTETRICAL INCISIONAL HEMATOMA OF PERINEUM	16
586	Z7592	EVACUATION OF OTHER HEMATOMA OF VULVA OR VAGINA	27
587	Z7599	OTHER OBSTETRIC OPERATIONS	314
588	Z8611	BIOPSY OF SKIN AND SUBCUTANEOUS TISSUE	17
589	Z863	LOCAL EXCISION OF LESION OF SKIN AND SUBCUTANEOUS TISSUE	243
590	Z8703	COMPUTERIZED AXIAL TOMOGRAPHY OF HEAD	76
591	Z8704	OTHER TOMOGRAPHY OF HEAD	15
592	Z8744	ROUTINE CHEST X-RAY, SO DESCRIBED	32
593	Z8801	COMPUTERIZED AXIAL TOMOGRAPHY OF ABDOMEN	161
594	Z8872	DIAGNOSTIC ULTRASOUND OF HEART	29
595	Z8878	DIAGNOSTIC ULTRASOUND OF GRAVID UTERUS	290
596	Z8879	OTHER DIAGNOSTIC ULTRASOUND	97
597	Z9212	SCAN OF HEAD, EXCEPT CEREBRUM	61
598	Z9649	OTHER GENITOURINARY INSTILLATION	15
599	Z9771	REMOVAL OF INTRAUTERINE CONTRACEPTIVE DEVICE	240
600	Z9905	TRANSFUSION OF PLATELETS	70
601	Z9906	TRANSFUSION OF COAGULATION FACTORS	152
602	Z9907	TRANSFUSION OF OTHER SERUM	369
603	Z9921	INJECTION OF ANTIBIOTIC	6187
604	Z9925	INJECTION/INFUSION OF CANCER CHEMOTHERAPEUTIC SUBSTANCE	16
605	Z9995	STRETCHING OF FORESKIN	20
606	Z99995	פיטדין	23033
607	30510	TOBACCO USE DISORDER, UNSPECIFIED USE (HEAVY SMOKER)	3885
608	30511	TOBACCO USE DISORDER, CONTINUOUS USE	698
609	30513		94
610	2809	IRON DEFICIENCY ANEMIA, UNSPECIFIED	29
611	28249	OTHER THALASSEMIA	101
612	282490	THALASSEMIA MAJOR	168
613	59010	AC.PYELONEPHRITIS WITHOUT LESION OF RENAL MEDULLARY NECROSIS	30
614	63310	TUBAL PREGNANCY WITHOUT INTRAUTERINE PREGNANCY	277
615	64501		42
617	7530 2	UNILATERAL RENAL AGENESIS	36
618	7852 1	SYSTOLIC MURMUR	25
619	E8889	UNSPECIFIED FALL	44
620	p48		40
621	V4585	INSULIN PUMP STATUS	42
622	Z0391	INJECTION OF ANESTHETIC INTO SPINAL CANAL FOR ANALGESIA	1360
623	Z65291	PARAOVARIAN CYST REMOVAL	29
624	Z9211	CEREBRAL SCAN	49
625	Z9919	INJECTION OF ANTICOAGULANT	31
626	Z9922	INJECTION OF OTHER ANTI-INFECTIVE	27
627	0041	SHIGELLA FLEXNERI	11
628	0270	LISTERIOSIS	11
629	20190	HODGKIN'S DIS.,UNSP. TYPE, UNSP. SITE, EXTRANODAL & SOLID ORGAN	19
630	2331	CARCINOMA IN SITU OF CERVIX UTERI	19
631	2362	NEOPLASM OF UNCERTAIN BEHAVIOR OF OVARY	11
632	25050	ADULT-ONSET DIABETES,NOT STATED AS UNCONTROLLED,+OPHTALMIC MANIFE	14
633	2724	OTHER AND UNSPECIFIED HYPERLIPIDEMIA	11
634	2727	LIPIDOSES	13
635	2738	OTHER DISORDERS OF PLASMA PROTEIN METABOLISM	11
636	27730	AMYLOIDOSIS, UNSPECIFIED	25
637	2862	CONGENITAL FACTOR XI DEFICIENCY	11
638	28731	IMMUNE THROMBOCYTOPENIC PURPURA	12
639	29680	MANIC-DEPRESSIVE PSYCHOSIS, UNSPECIFIED	13
640	34290	HEMIPLEGIA, UNSP., AFFECTING UNSP. SIDE	15
641	3469	MIGRAINE, UNSPECIFIED	12
642	3580	MYASTHENIA GRAVIS	11
643	3592	MYOTONIC DISORDERS	12
644	3961	MITRAL VALVE STENOSIS AND AORTIC VALVE INSUFFICIENCY	14
645	4210	ACUTE AND SUBACUTE BACTERIAL ENDOCARDITIS	13
646	4254	OTHER PRIMARY CARDIOMYOPATHIES	12
647	42731	ATRIAL FIBRILLATION	13
648	42781	SINOATRIAL NODE DYSFUNCTION	14
649	4359	UNSPECIFIED TRANSIENT CEREBRAL ISCHEMIA	15
650	4466	THROMBOTIC MICROANGIOPATHY	14
651	4739	UNSPECIFIED SINUSITIS (CHRONIC)	16
652	485	BRONCHOPNEUMONIA, ORGANISM UNSPECIFIED	12
653	496	CHRONIC AIRWAY OBSTRUCTION, NOT ELSEWHERE CLASSIFIED	12
654	5119	UNSPECIFIED PLEURAL EFFUSION	17
655	514	PULMONARY CONGESTION AND HYPOSTASIS	14
656	53011	REFLUX ESOPHAGITIS	11
657	53550	UNSP. GASTRITIS/GASTRODUODENITIS WITHOUT HEMORRHAGE	11
658	5459		16
659	55321	INCISIONAL HERNIA WITHOUT MENTION OF OBSTRUCTION OR GANGRENE	16
660	5839	NEPHRITIS/NEPHROPATHY,ACUTE OR CHRONIC;GLOMERULONEPHRITIS NOS.	15
661	6170	ENDOMETRIOSIS OF UTERUS	23
662	6173	ENDOMETRIOSIS OF PELVIC PERITONEUM	18
663	6180	PROLAPSE OF VAGINAL WALLS WITHOUT MENTION OF UTERINE PROLAPSE	13
664	6238	OTHER SPECIFIED NONINFLAMMATORY DISORDERS OF VAGINA	12
665	6248	SPECIF.NONINFLAMMATORY DISORDERS OF VULVA AND PERINEUM	13
666	64683	OTHER SPECIFIED ANTEPARTUM COMPLICATIONS	16
667	64703	ANTEPARTUM SYPHILIS	12
668	64843	ANTEPARTUM MENTAL DISORDERS OF MOTHER	12
669	64901	TOBACCO USE DISORDER OF MOTHER, WITH DELIVERY	161
670	64911	OBESITY COMPLICATING PREGNANCY, WITH DELIVERY	289
671	64931	COAGULATION DEFECTS COMPLICATING PREGNANCY, WITH DELIVERY	124
672	64941	EPILEPSY COMPLICATING PREGNANCY, WITH DELIVERY	65
673	66000	OBSTRUC.CAUSED BY MALPOSITION OF FETUS AT ONSET OF LABOR,UNSP.	15
674	66361	VASCULAR LESIONS OF CORD COMPLICAT.LABOR+DELIVERY,DELIVERED	12
675	66431	FOURTH-DEGREE PERINEAL LACERATION, WITH DELIVERY	18
676	66602	THIRD-STAGE POSTPARTUM HEMORRHAGE, WITH DELIVERY	12
677	7242	LUMBAGO	14
678	7243	SCIATICA	11
679	7291	MYALGIA AND MYOSITIS, UNSPECIFIED	19
680	74190	SPINA BIFIDA,UNSPECIFIED REGION,WITHOUT HYDROCEPHALUS	22
681	74330	CONGENITAL CATARACT, UNSPECIFIED	12
682	7533 2	CONGENITAL ECTOPIC KIDNEY	16
683	7820	DISTURBANCE OF SKIN SENSATION	12
684	7851	PALPITATIONS	13
685	78609	OTHER DYSPNEA & RESPIRATORY ABNORMALITY	20
686	7862	COUGH	17
687	7910	PROTEINURIA	14
688	80843	MULT.CLOSED PELVIC FRACT.WITH DISRUPTION OF PELVIC CIRCLE	12
689	8088	UNSPECIFIED CLOSED FRACTURE OF PELVIS	13
690	8674	INJURY TO UTERUS WITHOUT MENTION OF OPEN WOUND INTO CAVITY	12
691	92231	CONTUSION OF BACK	12
692	9952	UNSP.ADV.EFFECT OF DRUG,MEDICINAL/BIOLOGICAL SUBSTANCE N.E.S.	12
693	99811	HEMORRHAGE COMPLICATING A PROCEDURE	15
694	E8490	HOME ACCIDENTS	17
695	V0260	VIRAL HEPATITIS CARRIER, UNSP.	12
696	V08	ASYMPTOMATIC H.I.V INFECTION STATUS	17
697	v1502	PERSONAL HISTORY OF ALLERGY TO MILK PRODUCTS	17
698	V1503	PERSONAL HISTORY OF ALLERGY TO EGGS	15
699	V1641	FAMILY HISTORY OF MALIGNANT NEOPLASM OF OVARY	11
700	V2689	ENCOUNTER FOR OTHER SPECIFIED PROCREATIVE MANAGEMENT	278
701	V274	MOTHER WITH TWINS, BOTH STILLBORN	14
702	V420	KIDNEY REPLACED BY TRANSPLANT	12
703	V4586	BARIATRIC SURGERY STATUS	154
704	V5391	FITTING AND ADJUSTMENT OF INSULIN PUMP	23
705	Z0309	OTHER EXPLORATION AND DECOMPRESSION OF SPINAL CANAL	21
706	Z062	UNILATERAL THYROID LOBECTOMY	23
707	Z3998	CONTROL OF HEMORRHAGE, NOT OTHERWISE SPECIFIED	11
708	Z415 0	LAPAROSCOPIC TOTAL SPLENECTOMY	12
709	Z4562	OTHER PARTIAL RESECTION OF SMALL INTESTINE	13
710	Z4573	RIGHT HEMICOLECTOMY	11
711	Z4673	SUTURE OF LACERATION OF SMALL INTESTINE, EXCEPT DUODENUM	14
712	Z544	EXCISION OR DESTRUCTION OF PERITONEAL TISSUE	12
713	Z544 0	OMENTECTOMY	18
714	Z6595	RELEASE OF TORSION OF OVARY	16
715	Z6651	REMOVAL OF BOTH FALLOPIAN TUBES AT SAME OPERATIVE EPISODE	18
716	Z6739	OTHER EXCISION OR DESTRUCTION OF LESION OR TISSUE OF CERVIX	12
717	Z6849	OTHER AND UNSPECIFIED TOTAL ABDOMINAL HYSTERECTOMY	21
718	Z6919	OTHER EXC.OR DESTRUCTION OF UTERUS + SUPPORTING STRUCTURES	12
719	Z721	מלקחיים + תפירה	20
720	Z750 0	FETAL INJECTION FOR REDUCTION	12
721	Z8741	COMPUTERIZED AXIAL TOMOGRAPHY OF THORAX	13
722	Z9215	PULMONARY SCAN	13
